# Supplementary material for: High Exposure to Livestock Pathogens in Southern Pudu (Pudu puda) from Chile
Source: MDPI journal article supplement (doi:10.3390/ani14040526), 2024-02-06
Supplement: s1 [file s1]

Table S1: Serologic results conducted on free-ranging pudu samples collected 2017–2023 in Chile.

| ID | Sex | Age      | Location       | Admission date | Admission cause    | Pestivirus | BHV-1 | <i>Leptospira interrogans</i> | <i>Toxoplasma gondii</i> | <i>Neospora caninum</i> | <i>Chlamydia abortus</i> | <i>Coxiella burnetti</i> | <i>Brucella abortus</i> | Hepatitis E virus | SARS-COV-2 | Bluetongue virus | EHDV |
|----|-----|----------|----------------|----------------|--------------------|------------|-------|-------------------------------|--------------------------|-------------------------|--------------------------|--------------------------|-------------------------|-------------------|------------|------------------|------|
| 1  | F   | Adult    | Queilen        | 12-07-2017     | Vehicle collision  | Neg        | Neg   | -                             | -                        | -                       | -                        | -                        | -                       | -                 | -          | -                | -    |
| 2  | F   | Adult    | Quemchi        | 02-07-2018     | Dog attack         | Neg        | -     | -                             | Neg                      | -                       | Neg                      | Neg                      | -                       | -                 | -          | Neg              | Neg  |
| 3  | M   | Juvenile | Quellón        | 29-08-2018     | Capture miopathy   | Pos        | Neg   | Neg                           | Neg                      | Neg                     | Neg                      | Neg                      | -                       | -                 | -          | Neg              | -    |
| 4  | F   | Adult    | Degañ          | 01-12-2019     | Infectious disease | -          | -     | -                             | Neg                      | -                       | -                        | -                        | Neg                     | -                 | -          | -                | -    |
| 5  | M   | Adult    | Butalcura      | 25-01-2019     | Dog attack         | Neg        | Neg   | Neg                           | Neg                      | Neg                     | Neg                      | Neg                      | -                       | -                 | -          | Neg              | -    |
| 6  | M   | Adult    | Quellón        | 02-07-2019     | Dog attack         | Neg        | Neg   | Pos                           | Neg                      | Neg                     | Neg                      | Neg                      | -                       | -                 | -          | Neg              | -    |
| 7  | F   | Adult    | Pauldeo        | 04-09-2019     | Dog attack         | Pos        | -     | Neg                           | Neg                      | -                       | -                        | Neg                      | -                       | -                 | -          | Neg              | Neg  |
| 8  | M   | Juvenile | Playa Chacao   | 21-06-2019     | Vehicle collision  | Neg        | Neg   | Neg                           | Neg                      | Neg                     | -                        | Neg                      | Neg                     | -                 | -          | -                | -    |
| 9  | F   | Adult    | Degañ          | 11-05-2019     | Dog attack         | Neg        | Neg   | -                             | -                        | -                       | -                        | -                        | -                       | -                 | -          | -                | -    |
| 10 | F   | Adult    | Quiquel        | 12-06-2019     | Not information    | Neg        | Neg   | -                             | -                        | -                       | -                        | -                        | -                       | Neg               | -          | -                | -    |
| 11 | M   | Fawn     | Pauldeo        | 15-12-2019     | Orphan             | Neg        | -     | Pos                           | -                        | -                       | -                        | -                        | -                       | -                 | -          | -                | -    |
| 12 | F   | Juvenile | Hueihue-Ancud  | 02-12-2020     | Dog attack         | Neg        | Neg   | -                             | -                        | -                       | -                        | -                        | -                       | -                 | -          | -                | -    |
| 13 | M   | Adult    | Queilen        | 19-02-2020     | Infectious disease | Pos        | Neg   | -                             | -                        | -                       | -                        | -                        | -                       | -                 | -          | -                | -    |
| 14 | F   | Adult    | Queilen        | 05-11-2021     | Vehicle collision  | Pos        | Neg   | -                             | -                        | -                       | -                        | -                        | -                       | -                 | -          | -                | -    |
| 15 | F   | Adult    | Quemchi        | 01-07-2021     | Dog attack         | Neg        | Neg   | -                             | -                        | -                       | -                        | -                        | -                       | -                 | -          | -                | -    |
| 16 | F   | Adult    | Playa Lechagua | 15-07-2021     | Dog attack         | Neg        | Neg   | -                             | -                        | -                       | -                        | -                        | -                       | -                 | -          | -                | -    |
| 17 | F   | Adult    | Quellón        | 31-07-2021     | Not information    | Neg        | Neg   | -                             | -                        | -                       | -                        | -                        | -                       | Neg               | Neg        | -                | -    |
| 18 | M   | Adult    | Dalcahue       | 06-05-2021     | Vehicle collision  | Neg        | Neg   | -                             | -                        | -                       | -                        | -                        | -                       | -                 | -          | -                | -    |
| 19 | M   | Adult    | Dalcahue       | 30-09-2021     | Vehicle collision  | Neg        | Neg   | -                             | -                        | -                       | -                        | -                        | -                       | Neg               | Neg        | -                | -    |
| 20 | F   | Adult    | Llucio Montaña | 11-10-2021     | Dog attack         | Neg        | Neg   | -                             | -                        | -                       | -                        | -                        | -                       | -                 | -          | -                | -    |
| 21 | F   | Adult    | Ancud          | 28-10-2021     | Not information    | Neg        | Neg   | -                             | -                        | -                       | -                        | -                        | -                       | -                 | -          | -                | -    |
| 22 | M   | Juvenile | Quellon        | 31-10-2021     | Vehicle collision  | Neg        | Neg   | -                             | -                        | -                       | -                        | -                        | -                       | Neg               | Neg        | -                | -    |

|    |                  |                  |                   |            |                    |     |     |     |   |   |   |   |     |     |     |   |   |
|----|------------------|------------------|-------------------|------------|--------------------|-----|-----|-----|---|---|---|---|-----|-----|-----|---|---|
| 23 | F                | Juvenile         | San Juan Quellon  | 28-11-2021 | Vehicle collision  | Neg | Neg | -   | - | - | - | - | -   | Neg | Neg | - | - |
| 24 | F                | Adult            | Caulin            | 17-12-2021 | Dog attack         | Neg | Neg | -   | - | - | - | - | -   | -   | -   | - | - |
| 25 | F                | Fawn             | Caipulli          | 18-12-2021 | Orphan             | Neg | Neg | -   | - | - | - | - | -   | -   | -   | - | - |
| 26 | F                | Adult            | Chauman           | 23-12-2021 | Not information    | Neg | Neg | -   | - | - | - | - | -   | Neg | Neg | - | - |
| 27 | F                | Adult            | Guapilacuy        | 02-01-2022 | Dog attack         | Neg | Neg | -   | - | - | - | - | -   | Neg | Neg | - | - |
| 28 | M                | Fawn             | Huillinco         | 03-01-2022 | Orphan             | Neg | -   | -   | - | - | - | - | -   | Neg | Neg | - | - |
| 29 | M                | Adult            | Nal bajo          | 04-01-2022 | Dog attack         | Neg | Neg | -   | - | - | - | - | -   | -   | -   | - | - |
| 30 | M                | Adult            | Faro corona       | 05-01-2022 | Vehicle collision  | Neg | Neg | -   | - | - | - | - | -   | -   | -   | - | - |
| 31 | M                | Adult            | Lechagua          | 16-01-2022 | Dog attack         | Neg | Neg | -   | - | - | - | - | -   | -   | -   | - | - |
| 32 | M                | Fawn             | Butalcura         | 28-01-2022 | Infectious disease | Pos | -   | -   | - | - | - | - | -   | Neg | Neg | - | - |
| 33 | M                | Adult            | Chauman           | 31-01-2022 | Dog attack         | Neg | -   | -   | - | - | - | - | -   | Neg | Neg | - | - |
| 34 | F                | Adult            | Castro            | 05-02-2022 | Vehicle collision  | Neg | -   | -   | - | - | - | - | -   | Neg | Neg | - | - |
| 35 | F                | Adult            | Quichitue         | 12-02-2022 | Vehicle collision  | Neg | -   | -   | - | - | - | - | -   | Neg | Neg | - | - |
| 36 | F                | Juvenile         | Chonchi           | 17-02-2022 | Dog attack         | Neg | -   | -   | - | - | - | - | -   | Neg | Neg | - | - |
| 37 | M                | Adult            | Chepu             | 18-02-2022 | Dog attack         | Neg | -   | -   | - | - | - | - | -   | -   | -   | - | - |
| 38 | F                | Juvenile         | Lliuco, Quemchi   | 09-03-2022 | Dog attack         | Neg | -   | -   | - | - | - | - | -   | -   | -   | - | - |
| 39 | F                | Fawn             | Deñag, Ancud      | 02-05-2022 | Orphan             | -   | -   | -   | - | - | - | - | -   | Neg | Neg | - | - |
| 40 | F                | Adult            | Lechagua          | 29-05-2022 | Dog attack         | -   | -   | -   | - | - | - | - | -   | Neg | Neg | - | - |
| 41 | M                | Adult            | Compu, Castro     | 17-06-2022 | Vehicle collision  | -   | -   | -   | - | - | - | - | -   | Neg | Neg | - | - |
| 42 | Not informat ion | Not informa tion | Dalcahue          | 18-07-2022 | Not information    | -   | -   | -   | - | - | - | - | -   | Neg | Neg | - | - |
| 43 | M                | Juvenile         | Dalcahue          | 18-07-2022 | Dog attack         | Neg | -   | Neg | - | - | - | - | Neg | -   | -   | - | - |
| 44 | F                | Juvenile         | Dalcahue          | 03-08-2022 | Dog attack         | Neg | -   | Neg | - | - | - | - | Neg | -   | -   | - | - |
| 45 | M                | Juvenile         | Quellon           | 12-08-2022 | Dog attack         | Neg | -   | Neg | - | - | - | - | Neg | -   | -   | - | - |
| 46 | F                | Adult            | Caulin, Ancud     | 05-09-2022 | Dog attack         | Neg | -   | Neg | - | - | - | - | Neg | -   | -   | - | - |
| 47 | F                | Adult            | Chonchi           | 10-09-2022 | Dog attack         | Neg | -   | Neg | - | - | - | - | Neg | -   | -   | - | - |
| 48 | F                | Adult            | Recta de Taiquemó | 12-09-2022 | Vehicle collision  | Neg | -   | Neg | - | - | - | - | Neg | -   | -   | - | - |
| 49 | F                | Adult            | Quemchi           | 12-09-2022 | Dog attack         | Neg | -   | Neg | - | - | - | - | Neg | -   | -   | - | - |
| 50 | F                | Adult            | Caipulli          | 19-11-2022 | Dog attack         | Neg | -   | Neg | - | - | - | - | Neg | -   | -   | - | - |

|    |   |          |                              |            |                       |     |   |     |     |   |     |     |     |   |   |     |     |
|----|---|----------|------------------------------|------------|-----------------------|-----|---|-----|-----|---|-----|-----|-----|---|---|-----|-----|
| 51 | F | Adult    | Castro                       | 24-11-2022 | Dog attack            | Neg | - | Neg | -   | - | -   | -   | Neg | - | - | -   | -   |
| 52 | M | Juvenile | Cahuala                      | 28-11-2022 | Dog attack            | Neg | - | Neg | -   | - | -   | -   | Neg | - | - | -   | -   |
| 53 | M | Adult    | Dalcahue                     | 30-11-2022 | Dog attack            | Neg | - | Neg | -   | - | -   | -   | Neg | - | - | -   | -   |
| 54 | M | Juvenile | Púlpito, Castro              | 19-12-2022 | Vehicle<br>collission | Neg | - | Pos | -   | - | -   | -   | Neg | - | - | -   | -   |
| 55 | M | Adult    | Pilluco                      | 09-02-2023 | Vehicle<br>collission | Neg | - | Neg | -   | - | -   | -   | Neg | - | - | -   | -   |
| 56 | M | Adult    | Pumillahue                   | 18-03-2023 | Vehicle<br>collission | Neg | - | Neg | -   | - | -   | -   | Neg | - | - | -   | -   |
| 57 | M | Adult    | Parque<br>Nacional<br>Chiloe | 20-03-2023 | Dog attack            | Neg | - | Neg | -   | - | -   | -   | Neg | - | - | -   | -   |
| 58 | F | Adult    | Butalcura                    | 21-03-2023 | Vehicle<br>collission | Neg | - | Neg | -   | - | -   | -   | Neg | - | - | -   | -   |
| 59 | F | Adult    | Parque<br>Tantauco           | 04-04-2023 | Fox attack            | Neg | - | Neg | -   | - | -   | -   | Neg | - | - | -   | -   |
| 60 | M | Adult    | Linao,<br>Quemchi            | 29-04-2023 | Vehicle<br>collission | Neg | - | Neg | -   | - | -   | -   | Neg | - | - | -   | -   |
| 61 | F | Adult    | Chonchi                      | 01-05-2023 | Dog attack            | Neg | - | Neg | -   | - | -   | -   | Neg | - | - | -   | -   |
| 62 | F | Adult    | Quemchi                      | 01-05-2023 | Vehicle<br>collission | Neg | - | Neg | -   | - | -   | -   | Neg | - | - | -   | -   |
| 63 | M | Adult    | Puchilcan                    | 12-05-2023 | Dog attack            | -   | - | Neg | -   | - | -   | -   | Neg | - | - | -   | -   |
| 64 | M | Adult    | Pido, Quemchi                | 23-05-2023 | Dog attack            | Neg | - | Neg | -   | - | -   | -   | Neg | - | - | -   | -   |
| 65 | M | Adult    | Linao                        | 15-06-2023 | Dog attack            | Neg | - | Neg | -   | - | -   | -   | Neg | - | - | -   | -   |
| 66 | M | Juvenile | Puerto Mont                  | 26-11-2015 | Not<br>information    | Neg | - | Neg | Neg | - | Neg | Neg | -   | - | - | Neg | Neg |
| 67 | F | Adult    | Ralún                        | 01-11-2015 | Not<br>information    | Neg | - | -   | Neg | - | Neg | Neg | -   | - | - | Neg | Neg |
| 68 | F | Juvenile | Palihue                      | 02-12-2015 | Dog attack            | Neg | - | Neg | Neg | - | Neg | Neg | -   | - | - | Neg | Neg |
| 69 | M | Adult    | Ancud                        | 25-02-2016 | Dog attack            | Neg | - | Neg | Neg | - | Neg | Neg | -   | - | - | Neg | Neg |
| 70 | M | Juvenile | Correntoso                   | 26-05-2016 | Vehicle<br>collission | Neg | - | Neg | Neg | - | Neg | Neg | -   | - | - | Neg | -   |
| 71 | F | Adult    | Los<br>parrones.Río<br>Negro | 29-09-2016 | Dog attack            | Neg | - | Neg | Neg | - | Neg | Neg | -   | - | - | Neg | Neg |
| 72 | F | Adult    | Calle Ramón<br>Munita PM     | 25-10-2016 | Not<br>information    | Neg | - | Pos | Neg | - | Neg | Neg | -   | - | - | Neg | Neg |
| 73 | M | Adult    | Costa de<br>Osorno           | 07-03-2017 | Dog attack            | Neg | - | Neg | Neg | - | Neg | Neg | -   | - | - | Neg | Neg |
| 74 | F | Adult    | Hualahue                     | 27-03-2017 | Not<br>information    | Neg | - | Neg | Neg | - | Neg | Neg | -   | - | - | Neg | -   |
| 75 | M | Adult    | Calbuco                      | 05-07-2017 | Not<br>information    | Neg | - | Neg | Pos | - | Neg | Neg | -   | - | - | Neg | Neg |

[illegible]

|     |                        |                        |                    |                    |                       |     |     |     |   |   |   |     |     |     |     |     |   |
|-----|------------------------|------------------------|--------------------|--------------------|-----------------------|-----|-----|-----|---|---|---|-----|-----|-----|-----|-----|---|
|     |                        |                        |                    |                    | information           |     |     |     |   |   |   |     |     |     |     |     |   |
| 100 | M                      | Adult                  | Polincay           | 04-11-2021         | Vehicle<br>collission | Neg | Neg | Neg | - | - | - | Neg | Neg | -   | -   | -   | - |
| 101 | Not<br>informat<br>ion | Not<br>informa<br>tion | Pargua, Colaco     | 08-11-2021         | Vehicle<br>collission | Neg | Neg | Neg | - | - | - | Neg | Neg | -   | -   | -   | - |
| 102 | M                      | Adult                  | Pto Varas          | 04-12-2021         | Vehicle<br>collission | Neg | Neg | -   | - | - | - | -   | -   | -   | -   | -   | - |
| 103 | M                      | Adult                  | Osorno             | 24-01-2022         | Not<br>information    | Neg | Neg | -   | - | - | - | -   | -   | Neg | Neg | -   | - |
| 104 | Not<br>informat<br>ion | Not<br>informa<br>tion | Not<br>information | Not<br>information | Not<br>information    | Neg | -   | Neg | - | - | - | -   | Neg | -   | -   | -   | - |
| 105 | Not<br>informat<br>ion | Not<br>informa<br>tion | Not<br>information | Not<br>information | Not<br>information    | Neg | -   | Neg | - | - | - | -   | Neg | -   | -   | -   | - |
| 106 | Not<br>informat<br>ion | Not<br>informa<br>tion | Not<br>information | Not<br>information | Not<br>information    | -   | -   | Pos | - | - | - | -   | Neg | -   | -   | -   | - |
| 107 | Not<br>informat<br>ion | Not<br>informa<br>tion | Not<br>information | Not<br>information | Not<br>information    | -   | -   | Neg | - | - | - | -   | Neg | -   | -   | -   | - |
| 108 | F                      | Adult                  | Molina             | 13-04-2021         | Not<br>information    | Neg | Neg | -   | - | - | - | -   | -   | -   | -   | -   | - |
| 109 | F                      | Adult                  | Talca              | 09 11 2022         | Not<br>information    | Neg | Neg | -   | - | - | - | -   | Neg | -   | -   | Neg | - |

Table S2: Serum singles samples from captive pudus tested to determine the presence of livestock and zoonotic pathogens antibodies.

| Animal ID | Sex | Age      | Pestivirus | BHV-1 | <i>Leptospira</i>  | <i>Toxoplasma</i> | <i>Neospora</i> | <i>Chlamydia</i> | <i>Coxiella</i> | <i>Brucella</i> | Bluetongue virus | EEHD | M. bovis |
|-----------|-----|----------|------------|-------|--------------------|-------------------|-----------------|------------------|-----------------|-----------------|------------------|------|----------|
|           |     |          |            |       | <i>interrogans</i> | <i>gondii</i>     | <i>caninum</i>  | <i>abortus</i>   | <i>burnetti</i> | <i>abortus</i>  |                  |      |          |
| 1         | F   | Adult    | -          | Neg   | -                  | -                 | -               | -                | -               | Neg             | -                | -    | -        |
| 2         | F   | Adult    | -          | Neg   | -                  | -                 | -               | -                | -               | Neg             | Neg              | -    | -        |
| 4         | F   | Fawn     | -          | Neg   | -                  | -                 | -               | -                | -               | Neg             | -                | -    | -        |
| 6         | F   | Adult    | -          | Neg   | -                  | Pos               | -               | Neg              | Neg             | Neg             | Neg              | Neg  | Neg      |
| 7         | M   | -        | -          | Neg   | -                  | -                 | -               | -                | -               | Neg             | -                | -    | -        |
| 8         | -   | Juvenile | -          | Neg   | -                  | -                 | -               | -                | -               | -               | -                | -    | -        |
| 9         | -   | -        | -          | -     | -                  | Neg               | -               | -                | -               | Neg             | -                | -    | -        |
| 10        | M   | Juvenile | -          | Neg   | Neg                | Pos               | -               | Neg              | Neg             | Neg             | Neg              | -    | -        |
| 11        | F   | Adult    | Neg        | -     | Neg                | Neg               | -               | Neg              | Neg             | -               | -                | -    | -        |
| 14        | F   | Adult    | Neg        | -     | Neg                | Neg               | -               | Neg              | Neg             | -               | -                | Neg  | Neg      |
| 15        | F   | Adult    | Neg        | -     | Neg                | Pos               | -               | Neg              | Neg             | Neg             | Neg              | -    | -        |
| 17        | F   | Juvenile | Neg        | -     | Neg                | Neg               | Neg             | Neg              | Neg             | -               | -                | Neg  | Neg      |
| 19        | M   | Adult    | Neg        | Neg   | Neg                | Pos               | Pos             | Neg              | Neg             | -               | -                | Neg  | Neg      |
| 24        | F   | Adult    | Neg        | Neg   | Neg                | Neg               | -               | Neg              | Neg             | -               | -                | Neg  | Neg      |
| 26        | M   | Adult    | Neg        | -     | -                  | -                 | Neg             | Neg              | -               | -               | -                | -    | -        |
| 29        | M   | Adult    | Neg        | Neg   | -                  | -                 | Neg             | Neg              | -               | -               | -                | -    | -        |
| 31        | M   | Adult    | Neg        | Neg   | -                  | -                 | Neg             | Neg              | -               | -               | -                | -    | -        |
| 35        | H   | Fawn     | Neg        | -     | Neg                | Neg               | -               | Neg              | Neg             | -               | -                | Neg  | Neg      |
| 38        | M   | Fawn     | Neg        | Neg   | -                  | -                 | -               | -                | -               | -               | -                | -    | -        |
| 39        | M   | Fawn     | Neg        | Neg   | -                  | -                 | -               | -                | -               | -               | -                | -    | -        |
| 40        | F   | Juvenile | Neg        | Neg   | -                  | -                 | -               | -                | -               | -               | -                | -    | -        |
| 41        | F   | Juvenile | Neg        | Neg   | -                  | -                 | -               | -                | -               | -               | -                | -    | -        |
| 42        | M   | Juvenile | Neg        | Neg   | -                  | -                 | -               | -                | -               | -               | -                | -    | -        |
| 43        | M   | Juvenile | Neg        | Neg   | -                  | -                 | -               | -                | -               | -               | -                | -    | -        |
| 45        | -   | -        | Neg        | Neg   | -                  | -                 | -               | -                | -               | Neg             | Neg              | -    | -        |
| 46        | M   | Adult    | Neg        | Neg   | -                  | Neg               | Neg             | -                | Neg             | Neg             | -                | -    | -        |
| 47        | M   | Adult    | Neg        | Neg   | Pos Grippo         | Neg               | -               | Neg              | Neg             | Neg             | Neg              | Neg  | Neg      |

|    |   |       |     |     |     |     |   |     |     |     |     |     |     |
|----|---|-------|-----|-----|-----|-----|---|-----|-----|-----|-----|-----|-----|
| 48 | F | Adult | Neg | Neg | Neg | Pos | - | Neg | Neg | Neg | Neg | Neg | Neg |
| 49 | F | Adult | Pos | Neg | Neg | Neg | - | Neg | Neg | Neg | Neg | Neg | Neg |
| 50 | M | Adult | Neg | Neg | Neg | Neg | - | Neg | Neg | Neg | Neg | Neg | Neg |
| 51 | F | Adult | Neg | Neg | Neg | Pos | - | Neg | Neg | Neg | Neg | Neg | Neg |
| 52 | F | Adult | Neg | Neg | Neg | Neg | - | Neg | Neg | Neg | Neg | Neg | Neg |
| 53 | M | Adult | Pos | Neg | Neg | Neg | - | Neg | Neg | Neg | Neg | Neg | Neg |
| 54 | F | Adult | Neg | Neg | Neg | Neg | - | Neg | Neg | Neg | Neg | Neg | Neg |
| 55 | F | Adult | Neg | Neg | Neg | Neg | - | Neg | Neg | Neg | Neg | Neg | Neg |

---

Table S3: Serum samples from captive pudus tested to determine the presence of livestock and zoonotic pathogens antibodies in different years.

| ID | Sex | Age   | Pestivirus           | BHV-1                | <i>Leptospira interrogans</i>  | <i>Toxoplasma gondii</i> | <i>Neospora caninum</i> | <i>Chlamydia abortus</i> | <i>Coxiella burnetti</i> | <i>Brucella abortus</i> | Bluetongue virus     | EEHD                 | M. bovis |
|----|-----|-------|----------------------|----------------------|--------------------------------|--------------------------|-------------------------|--------------------------|--------------------------|-------------------------|----------------------|----------------------|----------|
| 3  | F   | Adult | -                    | Neg                  | -                              | Pos 2011<br>Pos 2013     | -                       | Neg 2011<br>Neg 2013     | Neg 2011<br>Neg 2013     | Neg                     | Neg                  | Neg                  | Neg      |
| 5  | M   | Adult | -                    | Neg                  | -                              | Pos                      | Neg                     | Neg                      | Neg                      | Neg                     | Neg 2011<br>Neg 2013 | Neg                  | Neg      |
| 12 | F   | Adult | Pos 2015             | Neg                  | Neg 2015<br>Pos Hardjo<br>2017 | Neg 2015<br>Pos 2017     | -                       | Neg                      | Neg                      | Neg                     | Neg                  | Neg                  | Neg      |
| 13 | M   | Adult | Neg 2015<br>Neg 2017 | -                    | Neg 2015<br>Neg 2017           | Pos 2015<br>Pos 2017     | Neg<br>2015<br>Neg 2017 | Neg 2015<br>Pos 2017     | Neg 2015<br>Neg 2017     | Neg 2015<br>Neg 2017    | Neg 2015<br>Neg 2017 | -                    | -        |
| 16 | F   | Adult | Neg 2017<br>Neg 2018 | Neg                  | Neg 2017<br>Neg 2018           | Neg 2017<br>Neg 2018     | Neg                     | Neg 2017<br>Neg 2018     | Neg 2017<br>Neg 2018     | Neg                     | Neg                  | Neg 2017<br>Neg 2018 | Neg      |
| 18 | M   | Adult | Neg 2020<br>Neg 2021 | Neg                  | Neg                            | -                        | Neg                     | Neg                      | Neg                      | Neg                     | Neg                  | -                    | -        |
| 20 | F   | Adult | Neg 2020<br>Neg 2021 | Neg 2020<br>Neg 2021 | -                              | -                        | Neg                     | Neg                      | -                        | -                       | -                    | -                    | -        |
| 21 | F   | Adult | Neg 2019<br>Neg 2020 | -                    | Neg                            | Pos 2019                 | Neg                     | Pos 2019<br>Pos 2020     | Neg                      | Neg                     | Neg                  | -                    | -        |
| 22 | F   | Adult | Neg 2018<br>Neg 2020 | -                    | Neg                            | Pos 2018                 | Neg                     | Pos 2018<br>Pos 2020     | Neg                      | -                       | -                    | Neg                  | Neg      |
| 23 | F   | Adult | Neg 2018<br>Neg 2020 | -                    | Neg                            | Neg                      | Neg                     | Neg 2018<br>Pos 2020     | Neg                      | -                       | -                    | Neg                  | Neg      |
